# Supplementary material for: Quantifying flooding regime in floodplain forests to guide river restoration
Source: Oxford University Press journal article supplement (doi:10.12952/journal.elementa.000031), 2014-09-03
Supplement: elementa_000031_s001.docx [file elementa_000031_s001.docx]

**Table S1: List of field sites and methods used to model flood regime at the site.**

| **Site_Name** | **River** | **State** | **River type** | **Transects** | **Watershed area (km2)** | **Flow data used (USGS gage numbers and dates)** | **Method used for computing stage data** |
| --- | --- | --- | --- | --- | --- | --- | --- |
| Stony Brook - DOT | Stony Brook | CT | Low-gradient small river | 2 | 32 | 1184100 (1981-05-07 to 2012-01-16) | HEC-RAS validated with field observation |
| Mill River Gage Whately | Mill | MA | Low-gradient small river | 3 | 54 | 1170930 (2006-10-01 to 2009-10-15) | HEC-RAS validated with field observation and USGS gage 1170930 stage data |
| South River Gage | South | MA | High-gradient river | 2 | 62 | 1169900 (1966-06-15 to 2012-01-16) | HEC-RAS validated with field observation and USGS gage 1169900 stage data |
| Coginchaug River | Coginchaug | CT | Low-gradient small river | 2 | 64 | 1192890 (1961-10-01 to 1980-12-01), 1192883 (1980-12-01, 2012-01-16) | HEC-RAS validated with field observation |
| Ayers Brook | Ayers Brook | VT | Low-gradient small river | 2 | 80 | 1142500 (1939-07-15 to 2012-01-16) | HEC-RAS validated with field observation |
| Pleasant Valley | Eightmile | CT | High-gradient river | 2 | 118 | 1194500 (1937-10-01 to 2012-01-16) | HEC-RAS validated with field observation |
| Victory Basin WMA | Moose | VT | High-gradient river | 2 | 119 | 1135000 (1928-08-07 to 1947-01-01), 1134500 (1947-01-01 to 2012-01-16) | HEC-RAS validated with field observation |
| Fort River Amherst | Fort | MA | Low-gradient small river | 5 | 125 | 1171300 (1966-06-13 to 1996-09-30) | HEC-RAS validated with field observation |
| Mill River Florence | Mill | MA | High-gradient river | 3 | 128 | 1171500 (1938-11-18 to 2012-01-16) | HEC-RAS validated with field observation |
| Fort River SO Conte NWR | Fort | MA | Low-gradient small river | 2 | 130 | 1171300 (1966-06-13 to 1996-09-30) | HEC-RAS validated with field observation |
| Barre Falls | Ware | MA | Low-gradient small river | 2 | 142 | not applicable | Reservoir pool stage record (1983-10-02 to 2010-01-01) |
| Leyden Woods | Green | MA | High-gradient river | 3 | 162 | 1170100 (1967-10-01 to 2012-01-16) | HEC-RAS validated with field observation |
| Granbrook Park | Salmon Brook | CT | High-gradient river | 2 | 173 | 1189500 (1946-10-01 to 1963-10-01), 1189390 (1963-10-01 to 1976-10-01) | HEC-RAS validated with field observation |
| South Ashuelot - Town of Swanzey conservation land | Ashuelot | NH | Low-gradient small river | 2 | 181 | 1160000 (1920-10-01 to 2011-06-30) | HEC-RAS validated with field observation |
| Scantic River SP Enfield Town Farm | Scantic | CT | Low-gradient small river | 2 | 184 | 1184500 (1928-10-01 to 1971-10-12), 1184490 (1971-10-12 to 2012-01-16) | HEC-RAS validated with field observation |
| Greenfield swim area | Green | MA | High-gradient river | 3 | 185 | 1170100 (1967-10-01 to 2012-01-16) | HEC-RAS validated with field observation |
| Hockanum River Park | Hockanum | CT | Low-gradient small river | 2 | 194 | 1192500 (1919-10-01 to 2012-01-16) | HEC-RAS validated with field observation |
| Scantic River SP at Melrose Road | Scantic | CT | Low-gradient small river | 2 | 205 | 1184500 (1928-10-01 to 1971-10-12), 1184490 (1971-10-12 to 2012-01-16) | HEC-RAS validated with field observation |
| Mascoma WMA | Mascoma | NH | Low-gradient small river | 2 | 211 | 1145000 (1939-07-26 to 1978-09-30) | HEC-RAS validated with field observation |
| Chester Town Land | West Branch Westfield | MA | High-gradient river | 2 | 218 | 1181000 (1935-09-01 to 2012-01-16) | HEC-RAS validated with field observation |
| Huntington-Chester Town Line | West Branch Westfield | MA | High-gradient river | 2 | 229 | 1181000 (1935-09-01 to 2012-01-16) | HEC-RAS validated with field observation |
| Quaboag WMA | Quaboag | MA | Low-gradient small river | 2 | 249 | 1176000 (1912-08-19 to 2012-01-16) | Datalogger stage record (2010-06-18 to 2011-08-26) , r2 = 0.79 |
| Surry Mountain | Ashuelot | NH | High-gradient river | 2 | 258 | not applicable | Reservoir pool stage record (1983-10-02 to 2010-01-01) |
| Third Branch White River | White | VT | High-gradient river | 2 | 276 | 1142500 (1939-07-15 to 2012-01-16) | HEC-RAS validated with field observation |
| Scantic River SP near Route 5 South Windsor | Scantic | CT | Low-gradient small river | 2 | 292 | 1184500 (1928-10-01 to 1971-10-12), 1184490 (1971-10-12 to 2012-01-16) | HEC-RAS validated with field observation |
| Ashuelot River Park | Ashuelot | NH | Low-gradient small river | 2 | 295 | 1158000 (1945-09-06 to 2012-01-16) | HEC-RAS validated with field observation |
| Webster WMA | Mascoma | NH | Low-gradient small river | 2 | 313 | 1145000 (1939-07-26 to 1978-09-30) | HEC-RAS validated with field observation |
| Kauffmann Forest | Upper Ammonoosuc | NH | Low-gradient small river | 2 | 393 | 1130000 (1940-08-10 to 2012-01-16) | HEC-RAS validated with field observation |
| Island at Winhall River Confluence | West | VT | High-gradient river | 3 | 418 | 1156000 (1919-09-13 to 1946-10-01), 1155500 (1946-10-01 to 1960-12-31) | HEC-RAS validated with field observation |
| Birch Hill | Millers | MA | Low-gradient small river | 1 | 454 | not applicable | Reservoir pool stage record (1983-10-02 to 2010-01-01) |
| Jamaica State Park | West | VT | High-gradient river | 2 | 457 | 1155500 (1946-10-01 to 2012-01-16) | HEC-RAS validated with field observation |
| Lyndonville | Passumpsic | VT | Low-gradient small river | 2 | 508 | 1133500 (1909-05-26 to 1928-11-15), 1135500 (1928-11-15 to 1997-10-01), 1133000 (1997-10-01 to 2012-01-16) | Datalogger stage record (2009-08-11 to 2010-07-23), r2 = 0.73 |
| Island in East Jamaica | West | VT | High-gradient river | 2 | 554 | 1155500 (1946-10-01 to 2012-01-16) | HEC-RAS validated with field observation |
| Huntington Island | Westfield | MA | High-gradient river | 3 | 584 | 1179500 (1909-08-26 to 2012-01-16) | HEC-RAS validated with field observation |
| Wardsboro Brook Confluence | West | VT | High-gradient river | 4 | 683 | 1156000 (1919-09-13 to 1989-09-30), 1155910 (1994-10-01 to 2009-11-23) | HEC-RAS validated with field observation |
| Townshend Reservoir | West | VT | High-gradient river | 2 | 704 | not applicable | Reservoir pool stage record (1983-10-02 to 2010-01-01) |
| Route 30 Bridge over West River | West | VT | High-gradient river | 3 | 780 | 1156000 (1919-09-13 to 1989-09-30), 1155910 (1994-10-01 to 2009-11-23) | HEC-RAS validated with field observation |
| South Ashuelot River Confluence | Ashuelot | NH | Low-gradient large river | 5 | 805 | 1161000 (1907-03-17 to 1994-04-01), 1160350 (1994-04-01 to 2012-01-16) | HEC-RAS validated with datalogger (2009-07-08 to 2010-06-21), aerial photo of 1Y RI flood and field observations |
| Dickinson Memorial Forest | Ashuelot | NH | Low-gradient large river | 4 | 813 | 1161000 (1907-03-17 to 1994-04-01), 1160350 (1994-04-01 to 2012-01-16) | HEC-RAS validated with field observation |
| Muster Field | Ashuelot | NH | Low-gradient large river | 2 | 816 | 1161000 (1907-03-17 to 1994-04-01), 1160350 (1994-04-01 to 2012-01-16) | HEC-RAS validated with field observation |
| West Swanzey Oxbows | Ashuelot | NH | Low-gradient large river | 2 | 844 | 1161000 (1907-03-17 to 1994-04-01), 1160350 (1994-04-01 to 2012-01-16) | HEC-RAS validated with field observation |
| Island at Rock River Confluence | West | VT | High-gradient river | 2 | 1024 | 1156000 (1919-09-13 to 1989-09-30), 1155910 (1994-10-01 to 2009-11-23) | HEC-RAS validated with field observation |
| Westfield River Westfield | Westfield | MA | High-gradient river | 2 | 1174 | 1183500 (1914-06-27 to 2012-01-16) | HEC-RAS validated with field observation |
| Avon - Fisher Farm Avon Land Trust | Farmington | CT | Low-gradient large river | 2 | 1192 | 1189995 (1971-10-01 to 1977-10-01), 1188090 (1977-10-01 to 2012-01-16) | HEC-RAS validated with field observation |
| Avon - Fisher Meadow | Farmington | CT | Low-gradient large river | 2 | 1194 | 1189995 (1971-10-01 to 1977-10-01), 1188090 (1977-10-01 to 2012-01-16) | HEC-RAS validated with field observation |
| Colebrook CT River Access | Connecticut | NH | Low-gradient large river | 2 | 1206 | 1129200 (1956-10-01 to 2012-01-16) | HEC-RAS validated with aerial photo of 2Y RI flood and field observations |
| Colebrook Mohawk River Confluence | Connecticut | NH | Low-gradient large river | 2 | 1263 | 1129200 (1956-10-01 to 2012-01-16) | HEC-RAS validated with aerial photo of 2Y RI flood and field observations |
| Simsbury Wildlife Area | Farmington | CT | Low-gradient large river | 3 | 1287 | 1189995 (1971-10-01 to 2012-01-16) | HEC-RAS validated with field observation |
| Farmington River Island Simsbury | Farmington | CT | Low-gradient large river | 2 | 1296 | 1189995 (1971-10-01 to 2012-01-16) | Datalogger stage record (2009-09-28 to 2010-08-04), r2=0.92 |
| Deerfield River Islands | Deerfield | MA | High-gradient river | 2 | 1453 | 1170000 (1904-03-29 to 1905-12-15 and 1940-10-01 to 2012-01-16), 1168500 (1913-06-19 to 1940-10-01), | HEC-RAS validated with field observation |
| Tarriffville Park | Farmington | CT | Low-gradient large river | 1 | 1491 | 1189995 (1971-10-01 to 2012-01-16) | Datalogger stage record (2009-09-28 to 2010-08-04), r2=0.92 |
| Windsor River Walk | Farmington | CT | Low-gradient large river | 1 | 1568 |  |  |
| White River WMA | White | VT | High-gradient river | 2 | 1696 | 1143500 (1909-05-12 to 1911-12-31), 1144000 (1915-06-09 to 2012-01-16) | HEC-RAS validated with field observation |
| Fort Hill WMA | Connecticut | NH | Low-gradient large river | 4 | 2311 | 1129500 (1930-08-13 to 2012-01-16) | HEC-RAS validated with aerial photo of 2Y RI & 10YRI flood and field observations |
| Maidstone Bends | Connecticut | VT | Low-gradient large river | 6 | 2404 | 1129500 (1930-08-13 to 2012-01-16) | HEC-RAS validated with datalogger (2009-08-26 to 2010-07-23) aerial photo of 2Y RI & 10YRI flood and field observations |
| Upper Ammonoosuc Confluence | Connecticut | NH | Low-gradient large river | 3 | 3044 | 1131500 (1927-03-18 to 2012-01-16) | Datalogger stage record (2009-08-26 to 2010-07-23), r2=0.81 |
| Israel River Confluence | Connecticut | NH | Low-gradient large river | 2 | 3554 | 1131500 (1927-03-18 to 2012-01-16) | Datalogger stage record (2009-08-20 to 2010-07-23), r2=0.94 |
| Howards Island | Connecticut | NH | Low-gradient large river | 3 | 7111 | 1140500 (1900-08-06 to 1918-10-01), 1139500 (1918-10-01 to 1950-09-30), 1138500 (1950-09-30 to 2012-01-16) | HEC-RAS validated with aerial photo of 2Y RI & 10YRI flood and field observations |
| Bedell Bridge State Park | Connecticut | NH | Low-gradient large river | 2 | 7309 | 1140500 (1900-08-06 to 1918-10-01), 1139500 (1918-10-01 to 1950-09-30), 1138500 (1950-09-30 to 2012-01-16) | HEC-RAS validated with aerial photo of 2Y RI & 10YRI flood and field observations |
| Fairlee Marsh WMA | Connecticut | VT | Low-gradient large river | 2 | 8014 | 1140500 (1900-08-06 to 1918-10-01), 1139500 (1918-10-01 to 1950-09-30), 1138500 (1950-09-30 to 2012-01-16) | Datalogger stage record (2011-03-02 to 2011-09-16), r2=0.72 |
| Reeds Marsh WMA | Connecticut | NH | Low-gradient large river | 2 | 8014 | 1140500 (1900-08-06 to 1918-10-01), 1139500 (1918-10-01 to 1950-09-30), 1138500 (1950-09-30 to 2012-01-16) | Datalogger stage record (2011-03-02 to 2011-09-16), r2=0.72 |
| Mascoma River Confluence | Connecticut | NH | Low-gradient large river | 2 | 11063 | 1144500 (1911-11-01 to 2012-01-16) | Datalogger stage record (2011-02-24 to 2011-06-20) , r2=0.98 |
| Bloods Brook Confluence | Connecticut | NH | Low-gradient large river | 1 | 11192 | 1144500 (1911-11-01 to 2012-01-16) | Datalogger stage record (2011-02-24 to 2011-06-20) , r2=0.98 |
| Burnaps Island | Connecticut | NH | Low-gradient large river | 1 | 11199 | 1144500 (1930-10-01 to 2012-01-16), 1151500 (1930-10-01 to 2012-01-16) | Datalogger stage record (2011-06-20 to 2011-09-16), r2=0.93 |
| Evarts Station | Connecticut | VT | Low-gradient large river | 2 | 11790 | 1144500 (1930-10-01 to 2012-01-16), 1151500 (1930-10-01 to 2012-01-16) | Datalogger stage record (2011-06-20 to 2011-09-16), r2=0.93 |
| Hart Island | Connecticut | NH | Low-gradient large river | 2 | 11840 | 1144500 (1930-10-01 to 2012-01-16), 1151500 (1930-10-01 to 2012-01-16) | HEC-RAS validated with aerial photo of 2Y RI flood and field observations |
| Cold River Confluence | Connecticut | NH | Low-gradient large river | 2 | 14484 | 1154500 (1942-03-06 to 2012-01-16), 1154000 (1942-03-06 to 2012-01-16) | Datalogger stage record (2011-02-24 to 2011-09-16), r2=0.88 |
| Hubbard Farms | Connecticut | NH | Low-gradient large river | 2 | 14525 | 1154500 (1942-03-06 to 2012-01-16), 1154000 (1942-03-06 to 2012-01-16) | Datalogger stage record (2011-02-24 to 2011-09-16), r2=0.88 |
| Partridge Brook Confluence | Connecticut | NH | Low-gradient large river | 1 | 14758 | 1154500 (1942-03-06 to 2012-01-16) | Datalogger stage record (2010-06-21 to 2011-09-16), r2=0.95 |
| Pauchaug Brook WMA | Connecticut | MA | Low-gradient large river | 2 | 17376 | 1170500 (1940-10-01 to 2012-01-16), 1170000 (1940-10-01 to 2012-01-16), 1166500 (1940-10-01 to 2012-01-16) | Datalogger stage record (2009-07-31 to 2011-09-16), r2=0.86 |
| Bennett Meadows WMA | Connecticut | MA | Low-gradient large river | 1 | 17440 | 1170500 (1940-10-01 to 2012-01-16), 1170000 (1940-10-01 to 2012-01-16), 1166500 (1940-10-01 to 2012-01-16) | Datalogger stage record (2009-07-31 to 2011-09-16), r2=0.86 |
| Turners Falls | Connecticut | MA | Low-gradient large river | 3 | 18630 | 1170500 (1904-03-31 to 2012-01-16) | Datalogger stage record (2011-02-23 to 2011-09-27), r2=0.99 |
| Deerfield River Confluence | Deerfield | MA | Low-gradient large river | 3 | 20379 | 1170500 (1904-03-31 to 2012-01-16) | Datalogger stage record (2008-10-15 to 2011-05-22), r2=0.77 |
| Green River Confluence | Green | MA | Low-gradient large river | 3 | 20379 | 1170500 (1904-03-31 to 2012-01-16) | Datalogger stage record (2008-10-15 to 2011-05-22), r2=0.77 |
| Sawmill River Confluence | Sawmill | MA | Low-gradient large river | 2 | 20462 | 1170500 (1904-03-31 to 2012-01-16) | Datalogger stage record (2009-10-08 to 2010-06-21), r2=0.99 |
| Third Sunderland Island | Connecticut | MA | Low-gradient large river | 1 | 20462 | 1170500 (1904-03-31 to 2012-01-16) | Datalogger stage record (2009-10-08 to 2010-06-21), r2=0.99 |
| Elwell Island | Connecticut | MA | Low-gradient large river | 2 | 20786 | 1172000 (1890-10-01 to 1899-12-31), 1170500 (1904-03-31 to 2012-01-16) | HEC-RAS validated with 2 dataloggers (2008-10-24 to 2011-08-03 and 2011-08-17 to 2011-09-27), aerial photo of 1Y RI flood and field observations |
| Elwell Mainland | Connecticut | MA | Low-gradient large river | 1 | 20786 | 1172000 (1890-10-01 to 1899-12-31), 1170500 (1904-03-31 to 2012-01-16) | HEC-RAS validated with 2 dataloggers (2008-10-24 to 2011-08-03 and 2011-08-17 to 2011-09-27), aerial photo of 1Y RI flood and field observations |
| Rainbow Beach CT River Greenway SP | Connecticut | MA | Low-gradient large river | 5 | 20941 | 1172000 (1890-10-01 to 1899-12-31), 1170500 (1904-03-31 to 2012-01-16) | HEC-RAS validated with 2 dataloggers (2008-10-24 to 2011-08-03 and 2011-08-17 to 2011-09-27), aerial photo of 1Y RI flood and field observations |
| Mitchs Island | Connecticut | MA | Low-gradient large river | 1 | 20949 | 1172000 (1890-10-01 to 1899-12-31), 1170500 (1904-03-31 to 2012-01-16) | HEC-RAS validated with 2 dataloggers (2008-10-24 to 2011-08-03 and 2011-08-17 to 2011-09-27), aerial photo of 1Y RI flood and field observations |
| Old course Mill River Northampton | Connecticut | MA | Low-gradient large river | 2 | 20949 | 1172000 (1890-10-01 to 1899-12-31), 1170500 (1904-03-31 to 2012-01-16) | HEC-RAS validated with 2 dataloggers (2008-10-24 to 2011-08-03 and 2011-08-17 to 2011-09-27), aerial photo of 1Y RI flood and field observations |
| Arcadia - Mill River Confluence & Neds Ditch | Connecticut | MA | Low-gradient large river | 7 | 21254 | 1172000 (1890-10-01 to 1899-12-31), 1170500 (1904-03-31 to 2012-01-16) | HEC-RAS validated with 2 dataloggers (2008-10-24 to 2011-08-03 and 2011-08-17 to 2011-09-27), aerial photo of 1Y RI flood and field observations |
| Northampton Oxbow | Connecticut | MA | Low-gradient large river | 2 | 21254 | 1172000 (1890-10-01 to 1899-12-31), 1170500 (1904-03-31 to 2012-01-16) | HEC-RAS validated with 2 dataloggers (2008-10-24 to 2011-08-03 and 2011-08-17 to 2011-09-27), aerial photo of 1Y RI flood and field observations |
| Bachelor Brook | Bachelor Brook | MA | Low-gradient large river | 1 | 21336 | 1172000 (1890-10-01 to 1899-12-31), 1170500 (1904-03-31 to 2012-01-16) | Datalogger stage record (2009-06-22 to 2010-07-16), r2=0.97 |
| Longmeadow - Fannie Stebbins Refuge | Connecticut | MA | Low-gradient large river | 2 | 24951 | 1184000 (1928-08-01 to 2012-01-16) | Datalogger stage record (2008-10-24 to 2009-09-08), r2=0.97 |
| Westfield River Confluence | Westfield | MA | Low-gradient large river | 1 | 24951 | 1184000 (1928-08-01 to 2012-01-16) | Datalogger stage record (2008-10-24 to 2009-09-08), r2=0.97 |
| Station 43 | Connecticut | CT | Low-gradient large river | 1 | 25493 | 1190070 (1997-01-01 to 2012-12-28) | HEC-RAS validated with stage data from 2 USGS gages (1190070, 1193000 ) and 8 dataloggers (2008-10-10 to 2011-09-23), aerial photo of 2Y RI flood and field observations |
| Loomis Chaffee | Connecticut | CT | Low-gradient large river | 5 | 27079 | 1190070 (1997-01-01 to 2012-12-28) | HEC-RAS validated with stage data from 2 USGS gages (1190070, 1193000 ) and 8 dataloggers (2008-10-10 to 2011-09-23), aerial photo of 2Y RI flood and field observations |
| Milo Peck | Farmington | CT | Low-gradient large river | 2 | 27079 | 1190070 (1997-01-01 to 2012-12-28) | HEC-RAS validated with stage data from 2 USGS gages (1190070, 1193000 ) and 8 dataloggers (2008-10-10 to 2011-09-23), aerial photo of 2Y RI flood and field observations |
| Vibert Road Boat Ramp | Connecticut | CT | Low-gradient large river | 1 | 27079 | 1190070 (1997-01-01 to 2012-12-28) | HEC-RAS validated with stage data from 2 USGS gages (1190070, 1193000 ) and 8 dataloggers (2008-10-10 to 2011-09-23), aerial photo of 2Y RI flood and field observations |
| Podunk River Confluence | Connecticut | CT | Low-gradient large river | 3 | 27131 | 1190070 (1997-01-01 to 2012-12-28) | HEC-RAS validated with stage data from 2 USGS gages (1190070, 1193000 ) and 8 dataloggers (2008-10-10 to 2011-09-23), aerial photo of 2Y RI flood and field observations |
| Folly Brook Eleanor Buck Wolf Parcel | Connecticut | CT | Low-gradient large river | 2 | 27523 | 1190070 (1997-01-01 to 2012-12-28) | HEC-RAS validated with stage data from 2 USGS gages (1190070, 1193000 ) and 8 dataloggers (2008-10-10 to 2011-09-23), aerial photo of 2Y RI flood and field observations |
| Folly Brook Natural Area | Connecticut | CT | Low-gradient large river | 2 | 27523 | 1190070 (1997-01-01 to 2012-12-28) | HEC-RAS validated with stage data from 2 USGS gages (1190070, 1193000 ) and 8 dataloggers (2008-10-10 to 2011-09-23), aerial photo of 2Y RI flood and field observations |
| Hockanum Meadows. Great Meadows | Connecticut | CT | Low-gradient large river | 3 | 27523 | 1190070 (1997-01-01 to 2012-12-28) | HEC-RAS validated with stage data from 2 USGS gages (1190070, 1193000 ) and 8 dataloggers (2008-10-10 to 2011-09-23), aerial photo of 2Y RI flood and field observations |
| Crow Point. Great Meadows | Connecticut | CT | Low-gradient large river | 2 | 27535 | 1190070 (1997-01-01 to 2012-12-28) | HEC-RAS validated with stage data from 2 USGS gages (1190070, 1193000 ) and 8 dataloggers (2008-10-10 to 2011-09-23), aerial photo of 2Y RI flood and field observations |
| Ferry Park Rocky Hill | Connecticut | CT | Low-gradient large river | 2 | 27777 | 1190070 (1997-01-01 to 2012-12-28) | HEC-RAS validated with stage data from 2 USGS gages (1190070, 1193000 ) and 8 dataloggers (2008-10-10 to 2011-09-23), aerial photo of 2Y RI flood and field observations |
| Goff Brook Great Meadows | Connecticut | CT | Low-gradient large river | 1 | 27777 | 1190070 (1997-01-01 to 2012-12-28) | HEC-RAS validated with stage data from 2 USGS gages (1190070, 1193000 ) and 8 dataloggers (2008-10-10 to 2011-09-23), aerial photo of 2Y RI flood and field observations |
| Wangunk Meadows WA | Connecticut | CT | Low-gradient large river | 1 | 27796 | 1190070 (1997-01-01 to 2012-12-28) | HEC-RAS validated with stage data from 2 USGS gages (1190070, 1193000 ) and 8 dataloggers (2008-10-10 to 2011-09-23), aerial photo of 2Y RI flood and field observations |
| Dead Mans Swamp | Connecticut | CT | Low-gradient large river | 2 | 27824 | 1190070 (1997-01-01 to 2012-12-28) | HEC-RAS validated with stage data from 2 USGS gages (1190070, 1193000 ) and 8 dataloggers (2008-10-10 to 2011-09-23), aerial photo of 2Y RI flood and field observations |
| Cromwell Meadows WA | Mattabessett | CT | Low-gradient large river | 2 | 28171 | 1190070 (1997-01-01 to 2012-12-28) | HEC-RAS validated with stage data from 2 USGS gages (1190070, 1193000 ) and 8 dataloggers (2008-10-10 to 2011-09-23), aerial photo of 2Y RI flood and field observations |
| Portland | Connecticut | CT | Low-gradient large river | 1 | 28171 | 1190070 (1997-01-01 to 2012-12-28) | HEC-RAS validated with stage data from 2 USGS gages (1190070, 1193000 ) and 8 dataloggers (2008-10-10 to 2011-09-23), aerial photo of 2Y RI flood and field observations |
| Haddam Neck WA | Connecticut | CT | Low-gradient large river | 4 | 28669 | 1190070 (1997-01-01 to 2012-12-28) | HEC-RAS validated with stage data from 2 USGS gages (1190070, 1193000 ) and 8 dataloggers (2008-10-10 to 2011-09-23), aerial photo of 2Y RI flood and field observations |
| Chapman Pond | Connecticut | CT | Low-gradient large river | 5 | 28706 | 1190070 (1997-01-01 to 2012-12-28) | HEC-RAS validated with stage data from 2 USGS gages (1190070, 1193000 ) and 8 dataloggers (2008-10-10 to 2011-09-23), aerial photo of 2Y RI flood and field observations |
